# Supplementary material for: Wind as a natural hazard in Poland
Source: Copernicus journal article supplement (doi:10.5194/egusphere-2023-1359), 2023-06-26
Supplement: Supplementary file [file egusphere-2023-1359-CC1-supplement.pdf]

In general, through the study of historical documents and weather station data, combined with existing wind speed classification standards, the author uses the extreme value probability method to put forward targeted wind speed classification standards suitable for Poland. This paper is innovative to a certain extent, but there are not enough cases to support the proposed wind speed classification standards. There is also a lack of further research to improve the accuracy of its wind speed classification, and the accuracy of its wind speed classification lacks convincing theoretical support.

**Technical Corrections:**

1. In paragraph 35, "the two types of climatic prevail" should be specified
2. In paragraph 60, "4.2 The Extreme Probability Paper," can the author find wind speed data recorded by meteorological stations over the past decade to model? After all, the climate over the past decade has undergone significant changes compared to the early 21st century, and using data from recent years is more conducive to enhancing persuasiveness.
3. In paragraph 80-85, how is the wind speed obtained by the first method specifically determined.
4. In the final Tables 1 and 2, the application should be based on the author's classification criteria, which can be presented as a small example, so that the classification criteria have practical application value.
